# Supplementary material for: Memory Support System in Spanish: A Pilot Study
Source: MDPI journal article supplement (doi:10.3390/brainsci11111379), 2021-10-21
Supplement: s1 [file s1]

**Figure S1:** Example of Two-Page-Per-Day Calendar in Spanish

1

## MARTES

Enero de 2019

| EVENTOS Y CITAS PROGRAMADOS |  | ✓ |
|-----------------------------|--|---|
|                             |  |   |
| 7<br>AM                     |  |   |
|                             |  |   |
| 8<br>AM                     |  |   |
|                             |  |   |
| 9<br>AM                     |  |   |
|                             |  |   |
| 10<br>AM                    |  |   |
|                             |  |   |
| 11<br>AM                    |  |   |
|                             |  |   |
| 12<br>PM                    |  |   |
|                             |  |   |
| 1<br>PM                     |  |   |
|                             |  |   |
| 2<br>PM                     |  |   |
|                             |  |   |
| 3<br>PM                     |  |   |
|                             |  |   |
| 4<br>PM                     |  |   |
|                             |  |   |
| 5<br>PM                     |  |   |
|                             |  |   |
| 6<br>PM                     |  |   |
|                             |  |   |
| 7<br>PM                     |  |   |
|                             |  |   |
| 8<br>PM                     |  |   |
|                             |  |   |
|                             |  |   |

[illegible]

Table S1: Intervention Plan/Questions (IPQs)

Table S1: Intervention Plan/Questions (IPQs)

**Preguntas de Aplicación**

Nombre: \_\_\_\_\_

**Puntuación: 0** – no puede mostrarla. **1** - necesita una señal directa. **2** – necesita señal(es) indirecta(s). **3** – da la respuesta o la señala sin ninguna señal del compañero. Empiece las preguntas con “mire en su agenda” ...

|                                                                                                                                                                 |  |  |  |  |  |  |  |  |  |  |  |
|-----------------------------------------------------------------------------------------------------------------------------------------------------------------|--|--|--|--|--|--|--|--|--|--|--|
| <b>Fecha de hoy:</b>                                                                                                                                            |  |  |  |  |  |  |  |  |  |  |  |
| <b>Por favor abra la agenda en el día de hoy. ¿Dónde está la fecha?</b> <i>Mira hacia la parte superior de cada página.</i>                                     |  |  |  |  |  |  |  |  |  |  |  |
| <b>¿Cuáles son las 3 secciones principales de la agenda para cada día?</b> <i>Dice las 3 secciones.</i>                                                         |  |  |  |  |  |  |  |  |  |  |  |
| <b>¿Dónde escribe las citas programadas para una determinada hora?</b> <i>Sección de “Eventos y citas programados” (junto a la hora).</i>                       |  |  |  |  |  |  |  |  |  |  |  |
| <b>¿Dónde escribe una nota acerca de algo?</b> (o sea, la información que puede ser útil más adelante). <i>Sección de “Notas (diario).”</i>                     |  |  |  |  |  |  |  |  |  |  |  |
| <b>¿Dónde debe escribir una lista de las tareas que necesita hacer</b> (pero no en un determinado momento)? <i>Sección “Por hacer (cosas pendientes)”</i> .     |  |  |  |  |  |  |  |  |  |  |  |
| <b>*¿Cómo debe marcar una tarea ya completada?</b>                                                                                                              |  |  |  |  |  |  |  |  |  |  |  |
| <b>* Cuando use esta agenda, usted debe poner una estrella junto a algo de alta prioridad. ¿Cómo debe marcar algo que es de alta prioridad?</b>                 |  |  |  |  |  |  |  |  |  |  |  |
| <b>* Quiero que durante el período de instrucción, vea la agenda por lo menos 3 veces diarias. ¿Cuántas veces debe mirar la agenda diariamente como mínimo?</b> |  |  |  |  |  |  |  |  |  |  |  |
| <b>Puntuación total (24 puntos posibles)</b>                                                                                                                    |  |  |  |  |  |  |  |  |  |  |  |

\*Indica que esto debe hacerse con el formato de aprendizaje sin errores y recuperación espaciada. La puntuación es solamente de 3 o de 0, sin ninguna señal. No permita que el paciente adivine.

### Preguntas de Aplicación

Nombre: \_\_\_\_\_

**Puntuación: 0** – no puede mostrarla. **1** - necesita una señal directa. **2** – necesita señal(es) indirecta(s). **3** – da la respuesta o la señala sin ninguna señal del compañero. Empiece las preguntas con “mire en su agenda” ...

|                                                                                                                                                                                                                          |  |  |  |  |  |  |  |  |  |
|--------------------------------------------------------------------------------------------------------------------------------------------------------------------------------------------------------------------------|--|--|--|--|--|--|--|--|--|
| <b>Fecha de hoy:</b>                                                                                                                                                                                                     |  |  |  |  |  |  |  |  |  |
| <b>¿Cuál es la fecha de hoy?</b> <i>Se remite a la agenda para asegurarse.</i>                                                                                                                                           |  |  |  |  |  |  |  |  |  |
| <b>Vea el día de hoy: ¿qué citas o eventos tiene programados?</b> <i>Revisa los eventos programados y las citas.</i>                                                                                                     |  |  |  |  |  |  |  |  |  |
| <b>Vea el día de hoy: ¿qué tiene en la lista de cosas pendientes por hacer</b> (aquello que no está programado para un momento específico)? <i>Revisa la sección de “Por hacer (cosas pendientes)”</i> .                 |  |  |  |  |  |  |  |  |  |
| <b>Vea el día de hoy: ¿puede marcar una estrella junto a algo que sea de alta prioridad? (O ¿qué marcó como de alta prioridad con una estrella?</b> <i>Revisa e identifica las prioridades, marca en caso necesario.</i> |  |  |  |  |  |  |  |  |  |
| <b>Vea el día de ayer: ¿llegó a todas sus citas e hizo todo lo que tenía pendiente?</b> <i>Revisa las cosas marcadas como hechas.</i>                                                                                    |  |  |  |  |  |  |  |  |  |
| <b>Vea el día de ayer: ¿quedó algo para el día siguiente porque no lo hizo?</b> <i>Revisa la lista y anota en el siguiente día lo que no terminó.</i>                                                                    |  |  |  |  |  |  |  |  |  |
| <b>Vea el día de ayer: ¿escribió alguna nota?</b> <i>Se remite a la sección de “Notas (diario)”</i> .                                                                                                                    |  |  |  |  |  |  |  |  |  |
| <b>*Usted decidió ver su agenda a (tal hora de la mañana), (tal hora de la tarde), (tal hora de la noche). ¿Cuándo revisa la agenda a diario?</b>                                                                        |  |  |  |  |  |  |  |  |  |
| <b>Puntuación total (24 puntos posibles)</b>                                                                                                                                                                             |  |  |  |  |  |  |  |  |  |

\*Primero, haga que el paciente escoja 3 momentos del día que tienen sentido para él (ella) y ocurren por la mañana, por la tarde y por la noche (p. ej.: comidas). De la respuesta con el formato de aprendizaje sin errores y recuperación espaciada. La puntuación es de 3 o de 0, sin ninguna señal. No permita que el paciente adivine.

## Preguntas de Adaptación

Nombre: \_\_\_\_\_

**Puntuación: 0** – no puede mostrarla. **1** - necesita una señal directa. **2** – necesita señal(es) indirecta(s). **3** – da la respuesta o la señala sin ninguna señal del compañero. Empiece las preguntas con “mire en su agenda” ...

|                                                                                                                                                                                              |  |  |  |  |  |  |  |  |  |
|----------------------------------------------------------------------------------------------------------------------------------------------------------------------------------------------|--|--|--|--|--|--|--|--|--|
| <b>Fecha de hoy:</b>                                                                                                                                                                         |  |  |  |  |  |  |  |  |  |
| <b>¿Con cuánta frecuencia mira usted su agenda todos los días?</b><br><i>Demuestra uso continuo, al menos 3 veces diarias.</i>                                                               |  |  |  |  |  |  |  |  |  |
| <b>Mire al último día (<u>escoja cualquier día de semana</u>), ¿llegó a todas sus citas y cómo sabe que lo hizo?</b><br><i>Demuestra que usa el sistema de marcar las cosas como hechas.</i> |  |  |  |  |  |  |  |  |  |
| <b>Mire al último (<u>escoja cualquier día de semana</u>), ¿qué completó de su lista de cosas pendientes por hacer? Por hacer (cosas pendientes), marca las cosas hechas.</b>                |  |  |  |  |  |  |  |  |  |
| <b>Mire al último día (<u>escoja cualquier día de semana</u>), ¿dejó para después alguna tarea que no terminó? Anota en el día siguiente lo que quedó incompleto.</b>                        |  |  |  |  |  |  |  |  |  |
| <b>Mire en la última semana y deme el ejemplo de alguna nota que escribió (información que deseaba recordar más tarde). Sección de “Notas (diario)”.</b>                                     |  |  |  |  |  |  |  |  |  |
| <b>¿Qué hizo el último fin de semana? Se remite a la agenda.</b>                                                                                                                             |  |  |  |  |  |  |  |  |  |
| <b>Mire al (<u>escoja un día que tenga algo que usted sabe es de alta prioridad, dentro de lo posible</u>), ¿qué cosa es de alta prioridad? Busca la estrella.</b>                           |  |  |  |  |  |  |  |  |  |
| <b>Mire al (<u>escoja un día después de hoy</u>), ¿está libre para ir a (escoja: almorzar, cenar, al cine)? Se remite a “Eventos y citas programados”.</b>                                   |  |  |  |  |  |  |  |  |  |
| <b>Puntuación total (24 puntos posibles)</b>                                                                                                                                                 |  |  |  |  |  |  |  |  |  |

**Table S2.** Demographics and Baseline Performance Non-Significant Results.

| Characteristic                            | Participant with SCD<br>who completed MSS<br>training ( <i>n</i> =20)<br>Mean (SD) | Participant with<br>SCD who did not<br>complete MSS<br>training ( <i>n</i> =4)<br>Mean (SD) | <i>t</i> -test or Chi-<br>Square/Fisher<br>exact test | <i>p</i> value |
|-------------------------------------------|------------------------------------------------------------------------------------|---------------------------------------------------------------------------------------------|-------------------------------------------------------|----------------|
| Age, years                                | 66.80 (10.29)                                                                      | 64.5 (7.59)                                                                                 | 0.42                                                  | 0.68           |
| Women, no. (%)                            | 16 (80)                                                                            | 3 (75)                                                                                      | 0.05                                                  | 0.82           |
| Education, years                          | 14.80 (3.59)                                                                       | 12.5 (4.73)                                                                                 | 1.11                                                  | 0.28           |
| Marital status, no. (%)                   |                                                                                    |                                                                                             | 0.30                                                  | 0.96           |
| Married                                   | 11 (55)                                                                            | 2 (50)                                                                                      |                                                       |                |
| Divorced/Separated                        | 4 (20)                                                                             | 1 (25)                                                                                      |                                                       |                |
| Widowed                                   | 4 (20)                                                                             | 1 (25)                                                                                      |                                                       |                |
| Single/never married                      | 1 (5)                                                                              | 0 (0)                                                                                       |                                                       |                |
| Ethnicity, no. (%)                        |                                                                                    |                                                                                             |                                                       |                |
| Hispanic/Latino                           | 20 (100)                                                                           | 4 (100)                                                                                     |                                                       |                |
| White                                     | 0 (0)                                                                              | 0 (0)                                                                                       |                                                       |                |
| Primary language, no. (%)                 |                                                                                    |                                                                                             | 0.21                                                  | 0.65           |
| Spanish                                   | 19 (95)                                                                            | 4 (100)                                                                                     |                                                       |                |
| English                                   | 0 (0)                                                                              | 0 (0)                                                                                       |                                                       |                |
| Both                                      | 1 (5)                                                                              | 0 (0)                                                                                       |                                                       |                |
| Language proficiency <sup>a</sup>         |                                                                                    |                                                                                             |                                                       |                |
| Spanish                                   | 6.26 (0.99)                                                                        | 6.25 (0.65)                                                                                 | 0.02                                                  | 0.98           |
| English                                   | 3.95 (1.78)                                                                        | 3.91 (1.82)                                                                                 | 0.48                                                  | 0.64           |
| Acculturation <sup>b</sup>                |                                                                                    |                                                                                             |                                                       |                |
| American culture                          | 2.60 (0.68)                                                                        | 2.57 (0.73)                                                                                 | 0.13                                                  | 0.89           |
| Culture of origin                         | 3.30 (0.46)                                                                        | 3.33 (0.45)                                                                                 | -0.38                                                 | 0.71           |
| Test score results                        |                                                                                    |                                                                                             |                                                       |                |
| WAT <sup>c</sup>                          |                                                                                    |                                                                                             | -0.05                                                 | 0.95           |
| Participant's memory functioning          | 34.20 (9.58)                                                                       | 32.86 (8.22)                                                                                | 1.26                                                  | 0.22           |
| <sup>d</sup>                              | 4.8 (1.7)                                                                          | 3.5 (2.52)                                                                                  | 1.06                                                  | 0.30           |
| MMSE <sup>e</sup>                         | 28.6 (1.4)                                                                         | 27.75 (1.89)                                                                                | 1.59                                                  | 0.12           |
| ST-DRS-2 <sup>f</sup>                     | 133.2 (7.0)                                                                        | 126.75 (9.54)                                                                               |                                                       |                |
| Place of birth, no. (%)                   |                                                                                    |                                                                                             | 0.82                                                  | 0.98           |
| Puerto Rico                               | 9 (45)                                                                             | 2 (50)                                                                                      |                                                       |                |
| Colombia                                  | 5 (25)                                                                             | 1 (25)                                                                                      |                                                       |                |
| Cuba                                      | 3 (15)                                                                             | 1 (25)                                                                                      |                                                       |                |
| Argentina                                 | 1 (5)                                                                              | 0 (0)                                                                                       |                                                       |                |
| Peru                                      | 1 (5)                                                                              | 0 (0)                                                                                       |                                                       |                |
| Nicaragua                                 | 1 (5)                                                                              | 0 (0)                                                                                       |                                                       |                |
| US. Mainland                              | 0 (0)                                                                              | 0 (0)                                                                                       |                                                       |                |
| Gross household annual income,<br>no. (%) |                                                                                    |                                                                                             | 1.21                                                  | 0.94           |
| <\$25,000                                 | 6 (30)                                                                             | 1 (25)                                                                                      |                                                       |                |
| \$25,000-49,999                           | 6 (30)                                                                             | 1 (25)                                                                                      |                                                       |                |
| \$50,000-74,999                           | 3 (15)                                                                             | 1 (25)                                                                                      |                                                       |                |
| \$75,000-99,999                           | 2 (10)                                                                             | 1 (25)                                                                                      |                                                       |                |
| \$100,000-149,000                         | 1 (5)                                                                              | 0 (0)                                                                                       |                                                       |                |
|                                           | 1 (5)                                                                              | 0 (0)                                                                                       |                                                       |                |

---

>\$150,000

---

*Note.* MMSE = Mini-Mental State Examination [16]; MSS = Memory Support System; ST-DRS-2 = Spanish Translation of the Dementia Rating Scale-Second edition [17]; WAT = Word Accentuation Test [29]. <sup>a</sup> Range is 1 to 7; higher score indicates greater self-report language proficiency. <sup>b</sup> Range is 1 to 4; higher score indicates greater self-report acculturation. <sup>c</sup> Range is 1 to 50; higher score indicates greater number of correctly read infrequent, prosodically accented Spanish words. <sup>d</sup> Range is 0 to 10; higher score indicates worse self-report memory functioning. <sup>e</sup> Range is 0 to 30; higher score indicates better global cognition. <sup>f</sup> Range is 0 to 144; higher score indicates better global cognition.
